# Supplementary material for: Ten Broad Spectrum Resistances to Downy Mildew Physically Mapped on the Sunflower Genome
Source: Front Plant Sci. 2018 Dec 4;9:1780. doi: 10.3389/fpls.2018.01780 (PMC6288771; doi:10.3389/fpls.2018.01780)
Supplement: Supplementary file 2 [file Table_2.XLSX]

## Sheet: Supplementary Table 1
Table S1. Summary of test cross progenies performed between resistance sources.
	Chr 1 - Plarg	Chr 4 - Pl17	Chr 8 - Pl6	Chr 13 -Pl5/Pl8
Lines with known resistances	PAA1, OQP7, OQP8, RHA419	COQ (HA458)	VKQ	XRQ, U8Q (HA460)	HAS40	HIS33	INTER35	HAS62	HAS103	HIS32	HIS36	HA85	HAS6	HAS42
New resistant lines
HAS40	X	X	X	X
HIS33	X	X	X	X	X
INTER35	X	X	X	X	X	X
HAS62	X	X	X	X	X	X	X
HAS103	X	X	X	X	X	X	X	X
HIS32	X	X	X	X		X	X
HIS36	X	X	X	X		X	X	X		X
HAS85	X	X	X	X	X	X	X	X	X	X
HAS6	X	X	X	X	X	X	X		X	X		X
HAS42	X	X	X	X	X	X		X	X	X		X	X
HAS54	X	X	X	X	X	X	X	X	X	X		X	X	X

## Sheet: Supplementary Table 2
Supplementary Table 2. Downy mildew resistance segregations of test cross progenies (susceptible x F1 between resistance sources). Segregations in red do not agree with the hypotheses tested.
Origin		wild H.annuus 650 Texas				H.resinosus interspecific pool				H.resinosus interspecific pool				wild H.annuus 775 Utah				wild H.annuus 662 Kansas				H.tomentosus interspecific pool				H.tomentosus interspecific pool				wild H.annuus 963 Wyoming				wild H.annuus 358 Wyoming				wild H.annuus 651 Oklahoma				wild H.annuus 662 Oklahoma
Resistant line		HAS40				HIS33				INTER 35				HAS62				HAS103				HIS32				HIS36				HAS85				HAS6				HAS42				HAS54
Linkage hypothesis		Chromosome 1 (or 4)				Chromosome 1				Chromosome 1				Chromosome 1 (+ 8)				Chromosome 2				Chromosome 4				Chromosome 4				Chromosome 4				New				Chromosome 13				Chromosome 13
chromosome - gene	Resistant line	race	observations	segregation	X²	race	observations	segregation	X²	race	observations	segregation	X²	race	observations	segregation	X²	race	observations	segregation	X²	race	observations	segregation	X²	race	observations	segregation	X²	race	observations	segregation	X²	race	observations	segregation	X²	race	observations	segregation	X²	race	observations	segregation	X²
Crosses of new lines with lines containing known Pl genes
Chr 1 - Plarg	PAA1	710	21S+7SII+34RII+41R/103	all R ???	?	710	16RII+164R/180	all R		710	221RII/221	all R		334 710	245R/245 42S-SII 49RII/91	all R 1R:1S ?	0.538					334 710	22S+7SII+20RII+78R /127 39S+6SII+13RII+242R/300	3R:1S 7R:1S	0.317 1.995					304 710	32S+8SII+11RII+231R/282 123S+31SII+49RII+249R/451	7R:1S 3R:1S	0.732 19.785	710	36S+71RII+112R/219	3R:1S ?	8.54	710	49S+50RII+119R/218	3R:1S	0.738
Chr 1 - Plarg	OQP7, OQP8																	304 334 710	15S+7SII+18RII+329R/369 7S+13RII+93R/113 139S+25SII+115RII+242R/521	all R ? 3R:1S 3R:1S	3.204 11.631	334 710	26S+6SII+18RII+98R /148 5S+ 4SII+ 4RII+ 91R/104	3R:1S 7R:1S	0.899 1.406									304 710 334	15S+4SII+18RII+286R/323 80S+18RII+185R/283 23S+4SII+4RII+148R/187	7R:1S 3R:1S 7R:1S	15.09 1.608 0.642					304 710	1S+16RII+375R/392 30S+4SII+20RII+51R/105	all R ? 3R:1S	3.043
Chr 1 - Plarg	RHA419					710	185RII/185	all R		710 334	24SII?+266RII+108R/398 305RII+2R/307	all R ? all R ?														710	62S+5RII+140R/207	3R:1S	2.7
Chr 4 - Pl17	COQ(HA458)	710	9S+2SII+29RII+201R/241	3R:1S	53.36	710	96S+27SII+79RII+140R/342	3R:1S	21.875 (1.715 if SII=RII)	710	57S+2SII+25RII+89R/163	3R:1S	7.628	710	114S+6SII+57RII+23R/200	1R:1S ?	8	710	34S+20RII+81R/135	3R:1S	0.002	710 334	0S+1RII+123R /124 18SII+54RII+85R /157	all R ? all R ?		710 334	13S+22SII+140RII+298R/473 2RII+144R/146	all R ? all R		710	196R/196	all R		710	142S+15SII+49RII+339R/560	3R:1S	4.652	710	73S+18RII+101R/192	3R:1S ?	17.318	710	61S+15RII+128R/204	3R:1S	2.608
Chr 8 - Pl6	VKQ	710	35S+8RII+154R/197	3R:1S	5.484	710	24S+22RII+49R/95	3R:1S	0.004	710	70S+31SII+94RII+247R/442	3R:1S	1.086	710	57S+11SII+34RII+109R/211	3R:1S	5.864	710	59S+11SII+20RII+160R/250	3R:1S	1.197	710	20S+20RII+55R/95	3R:1S	0.788	710	30S+72R/102	3R:1S	1.056	710	59S+173R/234	3R:1S	0.023	710	60S+191R/251	3R:1S	0.16	710	46S+9RII+115R/170	3R:1S	0.383	710	58S+4SII+24RII+129R/215	3R:1S	1.684
Chr 13 - Pl5/Pl8	XRQ, U8Q(HA460)	710	49S+14SII+47RII+76R/186	3R:1S	2.448	710	51S+99RII+42R/192	3R:1S	0.249	710	217S+13SII+305RII+235R/763	3R:1S	9.716	710	29S+7SII+31RII+40R/107	3R:1S	4.254	710	62S+16SII+48RII+116R/244	3R:1S	6.732	710	96S+303R/399	3R:1S	0.187	710	134S+60SII+195RII+64R/453	3R:1S	76.57 (5.06 if SII=RII)	710	83S+8RII+110R/201	3R:1S ?	28.388	710	59S+3SII+43RII+102R/207	3R:1S	2.7	710	3S+82RII+89R/174	all R ?		710	128RII+87R/215	all R
Crosses between new lines containing unmapped resistance genes
Chromosome 1	HAS40					710	35S+14SII+75RII+161R/285	all R? 3R:1S	9.241	710	52S+20RII+123R/185	3R:1S	0.288	334	21S+2SII+14RII+209R/246	all R ??	?	334 710	31S+6SII?+171R/208 38S+31 rotted+15RII+241R/325	3R:1S 3R:1S	5.755 2.456									304 710	76S+1RII+197R/274 70S+18RII+317R/405	3R:1S 3R:1S	1.092 12.828	304 710	76S+2SII+2RII+207R/287 66S+34RII+107R/207	3R:1S 3R:1S	0.724 5.219	304 334 710	70S+3SII+222R/295 21S+94R/115 52S+1SII+21RII+132R/206	3R:1S 3R:1S 3R:1S	0.010 2.779 0.058	334	21S+88R/109	3R:1S	1.907
Chromosome 1	HIS33									710	51RII/51	all R		710	68RII+136R/204	all R		710	20S+1SII+16RII+115R/152	7R:1S	0.281	710	66S+12RII+152R/230	3R:1S	1.671	710	31S+64RII/95	3R:1S	2.944	710	55S+23RII+156R/234	3R:1S	0.279	710	56S+41RII+95R/212	3R:1S	1.773	710	70S+54RII+164R/288	3R:1S	0.074	710 334	43S+10SII+67RII+101R/231 19S+4SII+23RII+57R/103	3R:1S 3R:1S	0.122 0.391
Chromosome 1	INTER35													710	4RII+89R/93	all R		710 334	138S+44SII+189RII+205R/576 37S+28SII+89RII+92R/246	3R:1S 3R:1S	13.337 0.265	710	90S+21SII+114R/225	1R:1S ?	0.04	710	76S+9SII+110RII+143R/338	3R:1S	0.004	710	85S+32SII+12RII+157R /286	3R:1S	38.51	710	86S+2SII+132RII+179R/399	3R:1S	1.841					710 334	78S+7SII+25RII+ 76R/186 (problem UUQ ? ) 26S+20SII+28RII+130R/204	1R:1S ? 3R:1S	0.128 0.652
Chromosome 1	HAS62																	334	45S+12SII+39RII+133R/229	3R:1S	0.123					334	61S+5SII+30RII+160R/256	3R:1S	0.083	334	95S+11RII+270R/376	3R:1S	0.014					334	43S+8RII+233R/284	7R:1S ?	1.811	334	22S+7SII+12RII+102R/143	3R:1S	1.695
Chromosome 2	HAS103																													334 710	73S+14RII+301R/388 33S+9RII+144R/186	all R? 3R:1S all R? 3R:1S	7.898 5.213	334 710	21S+2SII+8RII+72R/103 32S+10SII+10RII+76R/128	3R:1S 3R:1S	0.391 4.156	334 710	34S+15RII+111R/160 52S+17 rotted+3SII+36RII+168R/276	3R:1S 3R:1S	1.197 0.173	334 710	22S+6RII+130R/158 32S+12RII+147R/191	7R:1S 3R:1S	0.016 6.909
Chromosome 4	HIS32																									334	0S+1SII+72RII+220R/293	all R		334	1S+2SII+35RII+241R/279	all R		334	56S+13SII+11RII+190R/270	3R:1S	0.044	334	64S+9SII+17RII+170R /260	3R:1S	1.31	334	69S+43RII+191R / 303	3R:1S	0.8
Chromosome 4	HIS36
Chromosome 4	HA85																																	304 710	82S+5RII+198R/285 64S+5SII+7RII+139R/215	3R:1S 3R:1S	2.157 4.589	304 710	13S+2RII+71R/86 71S+26 rotted+3SII+17RII+306R/423	7R:1S 3R:1S	0.675 0.416	334 710	58S+7RII+204R/128 33S+5RII+79R/117	3R:1S 3R:1S	1.692 0.639
Chromosome 11	HAS6																																					304 710	57S+4RII+232R/293 51S+11RII+144R/206	3R:1S 3R:1S	4.535 0.006	334 710	74S+6SII+13RII+348R/441 55S+1SII+14RII+135R/205	3R:1S 3R:1S	11.039 0.586
Chromosome 13	HAS42																																									334 710	158R/158 26SII+23RII+357R/406	all R all R ?
Chromosome 13	HAS54

## Sheet: Supplementary Table 3
Supplementary Table 3. F3 progenies genotypes and numbers of markers used.
RR: homozygous resistant SEG : progeny segregating for resistance SS: homozygous susceptible
	Parental lines		F3 progenies genotyped		PolyHighResolution markers			Resistant region
Chromosome	Resistant	Susceptible	Number	Phenotypes	on genome	on chromosome concerned used for mapping	co-localised with resistance	Upstream flanking marker (position on genome)	Downstream flanking marker (position on genome)	Size of the region (bp)
1	HIS33	OPC3	63	17RR/24SEG/22SS	8548	412	57	AX-105357066 (Chr1:102630689)	AX-105553982 (Chr1:125235689)	22605000
1	HAS62	VKQ	27	12RR/1SEG/14SS	4179	482	68	AX-105722254 (Chr1:98900439)	AX-105872636 (Chr1:125227639)	26327200
1	INTER35	PAS5	38	16RR/0SEG/22SS	6564	399	87	AX-105533162 (Chr1:96964136)	AX-105898962 (Chr1:128938058)	31973922
1	HAS40	OEH	70	34RR/10SEG/26SS	4138	221	0	AX-105714634 (Chr1:150259178)	AX-105461249 (Chr1:150333974)	74796
2	HAS103	XRQ	45	16RR/19SEG/10SS	7423	345	219	AX-105806215 (Chr2:25932652)	AX-105952922 (Chr2:140077949)	114145297
4	HAS85	DI	72	32RR/15SEG/25SS	5411	296	0	AX-105890384 (Chr4:6934926)	AX-105933470 (Chr4:7067040)	132114
4	HIS36	VKQ	63	13RR/30SEG/20SS	6881	200	0	AX-105633491 (Chr4:6619125)	AX-105852138 (Chr4:8422922)	1803797
4	HIS32	VKQ	33	18RR/1SEG/14SS	4232	271	2	AX-105686909 (Chr4:2179106)	AX-105866639 (Chr4:6401313)	4222207
4	IDAHO	PMI3	59	27RR/0SEG/32SS	6330	246	0	AX-105394647 (Chr4:5389308)	AX-105636975 (Chr4:6372483)	983175
11	HAS6	OPC2	61	27RR/18SEG/16SS	4276	114	6	AX-105718860 (Chr11:158582987)	AX-105658413 (Chr11:159905876)	1322889
13	HAS42	PSM7	65	25RR/10SEG/30SS	6879	330	10	AX-105726618 (Chr13:193670972)	AX-105796206 (Chr13:196200788)	2529816
13	HAS54	VKQ	39	28RR/6SEG/5SS	6575	263	70	AX-105891229 (Chr13:188579845)	End of chromosome (Chr13:197258317)	8678472

## Sheet: Supplementary Table 4
Supplementary Table 4. Details of markers co-localizing with downy mildew resistances. No markers co-localized with resistance in lines HAS40, HIS36, IDAHO and HAS85.
HIS33	INTER35	HAS62	HAS103	HIS32	HAS6	HAS42	HAS54
AX-105357166	AX-105373052	AX-105369089	AX-105357217	AX-105518788	AX-105680469	AX-105415546	AX-105363369
AX-105361333	AX-105669086	AX-105373052	AX-105357628	AX-105863406	AX-105767672	AX-105522343	AX-105373469
AX-105367742	AX-105530149	AX-105378268	AX-105372794		AX-105771590	AX-105619783	AX-105379533
AX-105369089	AX-147201723	AX-105379209	AX-105381644		AX-105782399	AX-105659300	AX-105380903
AX-105404889	AX-105410221	AX-105390269	AX-105383614		AX-105815526	AX-105661512	AX-105396607
AX-105406720	AX-105379209	AX-105398751	AX-105384298		AX-105920611	AX-105765790	AX-105397658
AX-105428614	AX-105879153	AX-105404889	AX-105388829			AX-105804292	AX-105416697
AX-105437630	AX-105880672	AX-105406720	AX-105394132			AX-147200981	AX-105420694
AX-105437980	AX-147206894	AX-105428614	AX-105402354			AX-147200985	AX-105428107
AX-105494736	AX-147201871	AX-105428706	AX-105407979			AX-147204578	AX-105443189
AX-105510957	AX-105398751	AX-105437980	AX-105409974				AX-105457088
AX-105519918	AX-105701690	AX-105443150	AX-105413270				AX-105489413
AX-105522221	AX-105760864	AX-105456748	AX-105415145				AX-105489814
AX-105541498	AX-105889096	AX-105514138	AX-105415966				AX-105491495
AX-105549514	AX-105571248	AX-105515803	AX-105422391				AX-105508538
AX-105555127	AX-105510957	AX-105526301	AX-105425334				AX-105510723
AX-105571248	AX-105596544	AX-105530149	AX-105425626				AX-105512115
AX-105585586	AX-105639935	AX-105541498	AX-105427017				AX-105516985
AX-105597535	AX-105923333	AX-105571164	AX-105429352				AX-105576363
AX-105608260	AX-105578677	AX-105571248	AX-105430156				AX-105580595
AX-105639935	AX-105517953	AX-105585586	AX-105432506				AX-105600287
AX-105644837	AX-105443150	AX-105596544	AX-105433694				AX-105647060
AX-105652998	AX-105914958	AX-105608260	AX-105437239				AX-105648341
AX-105705499	AX-105801345	AX-105612988	AX-105439645				AX-105657634
AX-105734779	AX-105734779	AX-105622246	AX-105445595				AX-105661512
AX-105739246	AX-105369089	AX-105623561	AX-105460515				AX-105661579
AX-105744964	AX-147197512	AX-105625483	AX-105470991				AX-105663859
AX-105745008	AX-105914458	AX-105639935	AX-105474811				AX-105665566
AX-105760022	AX-105428706	AX-105669086	AX-105476473				AX-105667524
AX-105760864	AX-105494736	AX-105701690	AX-105483773				AX-105674307
AX-105777853	AX-105918777	AX-105705499	AX-105485352				AX-105675437
AX-105783016	AX-105948473	AX-105714473	AX-105486004				AX-105679076
AX-105805276	AX-105927300	AX-105734779	AX-105490159				AX-105688890
AX-105806390	AX-105522221	AX-105744964	AX-105496260				AX-105689970
AX-105809324	AX-105814631	AX-105760864	AX-105511266				AX-105712804
AX-105814631	AX-105541498	AX-105772893	AX-105513448				AX-105717999
AX-105820111	AX-105809324	AX-105777853	AX-105518100				AX-105719454
AX-105841052	AX-105636631	AX-105779871	AX-105521477				AX-105720139
AX-105869897	AX-105608260	AX-105780751	AX-105521491				AX-105721056
AX-105889096	AX-105945511	AX-105783016	AX-105522026				AX-105723692
AX-105896272	AX-105905964	AX-105789621	AX-105523974				AX-105738088
AX-105905964	AX-147199201	AX-105793655	AX-105525904				AX-105748527
AX-105906050	AX-147198589	AX-105801129	AX-105530617				AX-105766244
AX-105916444	AX-105437980	AX-105809324	AX-105531992				AX-105772675
AX-105918777	AX-105406720	AX-105814631	AX-105535529				AX-105781017
AX-105923333	AX-105585586	AX-105829667	AX-105536256				AX-105782240
AX-105927989	AX-105428614	AX-105840335	AX-105537152				AX-105789753
AX-105938374	AX-105783016	AX-105855021	AX-105539681				AX-105792393
AX-105943592	AX-105908200	AX-105870458	AX-105542286				AX-105795733
AX-105948473	AX-105514138	AX-105887494	AX-105550954				AX-105796206
AX-105951298	AX-105953831	AX-105889096	AX-105551220				AX-105800202
AX-147198588	AX-105423349	AX-105905202	AX-105551779				AX-105804292
AX-147198589	AX-105905202	AX-105905964	AX-105552030				AX-105813966
AX-147199487	AX-105682632	AX-105908167	AX-105555753				AX-105838504
AX-147199905	AX-105612339	AX-105908200	AX-105556914				AX-105863150
AX-147201830	AX-105711333	AX-105914958	AX-105561744				AX-105891715
AX-147206894	AX-105800708	AX-105923333	AX-105566995				AX-105894874
	AX-105872636	AX-105927300	AX-105567386				AX-105919195
	AX-105719097	AX-147198126	AX-105568770				AX-105921016
	AX-105930581	AX-147198588	AX-105569662				AX-105931936
	AX-105867457	AX-147198589	AX-105572051				AX-105933641
	AX-105397205	AX-147199201	AX-105573601				AX-105936167
	AX-105708585	AX-147199487	AX-105577227				AX-147199797
	AX-105875191	AX-147200736	AX-105584144				AX-147199802
	AX-105526374	AX-147201284	AX-105585131				AX-147200500
	AX-105777297	AX-147201723	AX-105591657				AX-147200984
	AX-105496002	AX-147201871	AX-105595152				AX-147203063
	AX-105933396	AX-147206894	AX-105599171				AX-147203064
	AX-147199598		AX-105600061				AX-147204578
	AX-105897844		AX-105605537				AX-147791847
	AX-105943371		AX-105610927
	AX-105638559		AX-105611931
	AX-147199611		AX-105615698
	AX-105709123		AX-105617772
	AX-105801358		AX-105617877
	AX-105938889		AX-105619178
	AX-105578328		AX-105622143
	AX-105704868		AX-105628298
	AX-147199281		AX-105632870
	AX-90003624		AX-105645049
	AX-147201161		AX-105645375
	AX-105730691		AX-105647600
	AX-105401430		AX-105650912
	AX-105495286		AX-105654409
	AX-105649267		AX-105657181
	AX-105912005		AX-105661063
	AX-105607985		AX-105661430
			AX-105666808
			AX-105669540
			AX-105674164
			AX-105676445
			AX-105683562
			AX-105686331
			AX-105686340
			AX-105690250
			AX-105691374
			AX-105695060
			AX-105695829
			AX-105696330
			AX-105696649
			AX-105697931
			AX-105698551
			AX-105702418
			AX-105705632
			AX-105707388
			AX-105709819
			AX-105721355
			AX-105729827
			AX-105729857
			AX-105735482
			AX-105736793
			AX-105739355
			AX-105742251
			AX-105742639
			AX-105750279
			AX-105753032
			AX-105757524
			AX-105758070
			AX-105760541
			AX-105761057
			AX-105763355
			AX-105765261
			AX-105765615
			AX-105765896
			AX-105769707
			AX-105775395
			AX-105776047
			AX-105783403
			AX-105784302
			AX-105792627
			AX-105794665
			AX-105795816
			AX-105796012
			AX-105797323
			AX-105801234
			AX-105804670
			AX-105810780
			AX-105811086
			AX-105812071
			AX-105816199
			AX-105818885
			AX-105820061
			AX-105821068
			AX-105821757
			AX-105825860
			AX-105829101
			AX-105830510
			AX-105831143
			AX-105832068
			AX-105835475
			AX-105835734
			AX-105835753
			AX-105838597
			AX-105843690
			AX-105845430
			AX-105854360
			AX-105854740
			AX-105855049
			AX-105855467
			AX-105857965
			AX-105858083
			AX-105858563
			AX-105859180
			AX-105871193
			AX-105871615
			AX-105872841
			AX-105876765
			AX-105877006
			AX-105877202
			AX-105880634
			AX-105880839
			AX-105882391
			AX-105884701
			AX-105886835
			AX-105888297
			AX-105888944
			AX-105889485
			AX-105890233
			AX-105890469
			AX-105890951
			AX-105891077
			AX-105893660
			AX-105896141
			AX-105897678
			AX-105900547
			AX-105902593
			AX-105907179
			AX-105908093
			AX-105908129
			AX-105910666
			AX-105913604
			AX-105914986
			AX-105916983
			AX-105917833
			AX-105920609
			AX-105925863
			AX-105925891
			AX-105927631
			AX-105929745
			AX-105930594
			AX-105930998
			AX-105932146
			AX-105932396
			AX-105935571
			AX-105944030
			AX-105946718
			AX-105947857
			AX-105954060
			AX-147197890
			AX-147199182
			AX-147199306
			AX-147199763
			AX-147199885
			AX-147200029
			AX-147201250
			AX-147201654
			AX-147201903
			AX-147203512
			AX-147205703
